# Supplementary material for: Water-deficiency conditions differently modulate the methylome of roots and leaves in barley (Hordeum vulgare L.)
Source: PubMed Central journal article supplement (PMC4753852; doi:10.1093/jxb/erv552), 2016-01-05
Supplement: supp_erv552_supplementary_figure_S1_tables_S2_S3.pdf [file supp_erv552_supplementary_figure_S1_tables_S2_S3.pdf]

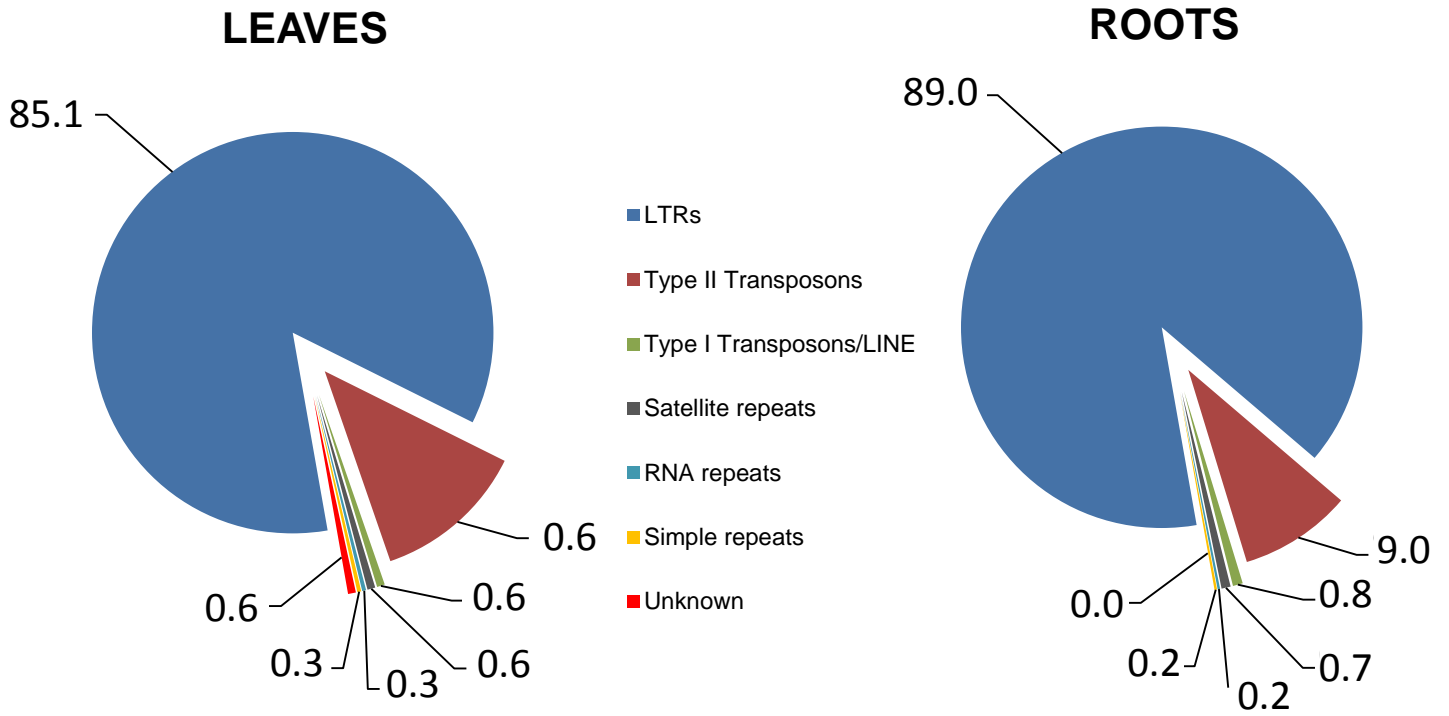

**Supplementary Figure S1.** The percentages of different repetitive element groups that underwent changes in roots or leaves under water deficiency stress and subsequent rewatering.

**Supplementary Table S2.** MSAP bands patterns corresponding to possible DNA methylation

| Band pattern | <i>Hpa</i> II | <i>Msp</i> I | Type                                                                                                                                                   | Methylation state                                   |
|--------------|---------------|--------------|--------------------------------------------------------------------------------------------------------------------------------------------------------|-----------------------------------------------------|
| I            | 1             | 1            | Demethylated or hemimethylated inner C                                                                                                                 | CCGG or CCGG<br>GGCC GGCC                           |
| II           | 1             | 0            | Hemimethylated outer C or one strand hemimethylated                                                                                                    | CCGG or CCGG<br>GGCC GGCC                           |
| III          | 0             | 1            | Fully methylated inner C                                                                                                                               | CCGG<br>GGCC                                        |
| IV           | 0             | 0            | Fully methylated or fully methylated outer C or fully methylated outer C + hemimethylated inner C or hemimethylated outer C + fully methylated inner C | CCGG or CCGG or CCGG or CCGG<br>GGCC GGCC GGCC GGCC |

states

**Supplementary Table S3.** The percentages of different LTR types that underwent changes in roots or leaves under water deficiency stress and subsequent rewatering

| <b>LEAVES</b> |          | <b>ROOTS</b> |          |
|---------------|----------|--------------|----------|
| <b>Group</b>  | <b>%</b> | <b>Group</b> | <b>%</b> |
| Gypsy         | 29.4     | Gypsy        | 22.8     |
| SUKKULA       | 15.6     | BARE         | 21.6     |
| BAGY          | 11.9     | SUKKULA      | 13.3     |
| BARE          | 8.9      | BAGY         | 11       |
| Copia         | 8.9      | Maximus      | 8.3      |
| Maximus       | 7.4      | SABRINA      | 7.3      |
| SABRINA       | 6.7      | Copia        | 5.3      |
| INGA          | 4.1      | INGA         | 3.8      |
| CEREBA        | 2.6      | CEREBA       | 3.6      |
| IKEROS        | 1.9      | NIKITA       | 0.9      |
| INAV          | 1.1      | OPHELIA      | 0.7      |
| OPHELIA       | 0.7      | INAV         | 0.6      |
| Unknown       | 0.7      | IKEROS       | 0.5      |
| NIKITA        | 0        | Unknown      | 0.3      |
